# Supplementary material
Source: PubMed Central journal article supplement (PMC4916878)

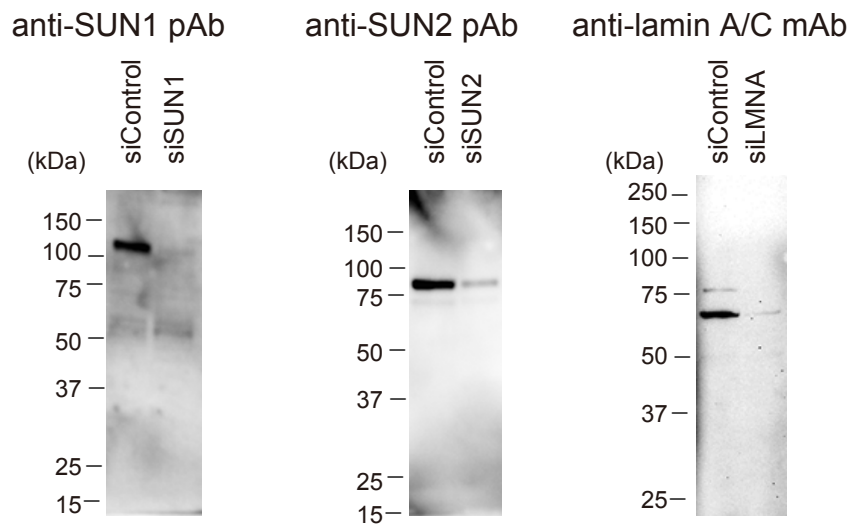

Supplement: kncl-07-01-1149664-s004.pdf [file kncl-07-01-1149664-s004.pdf]

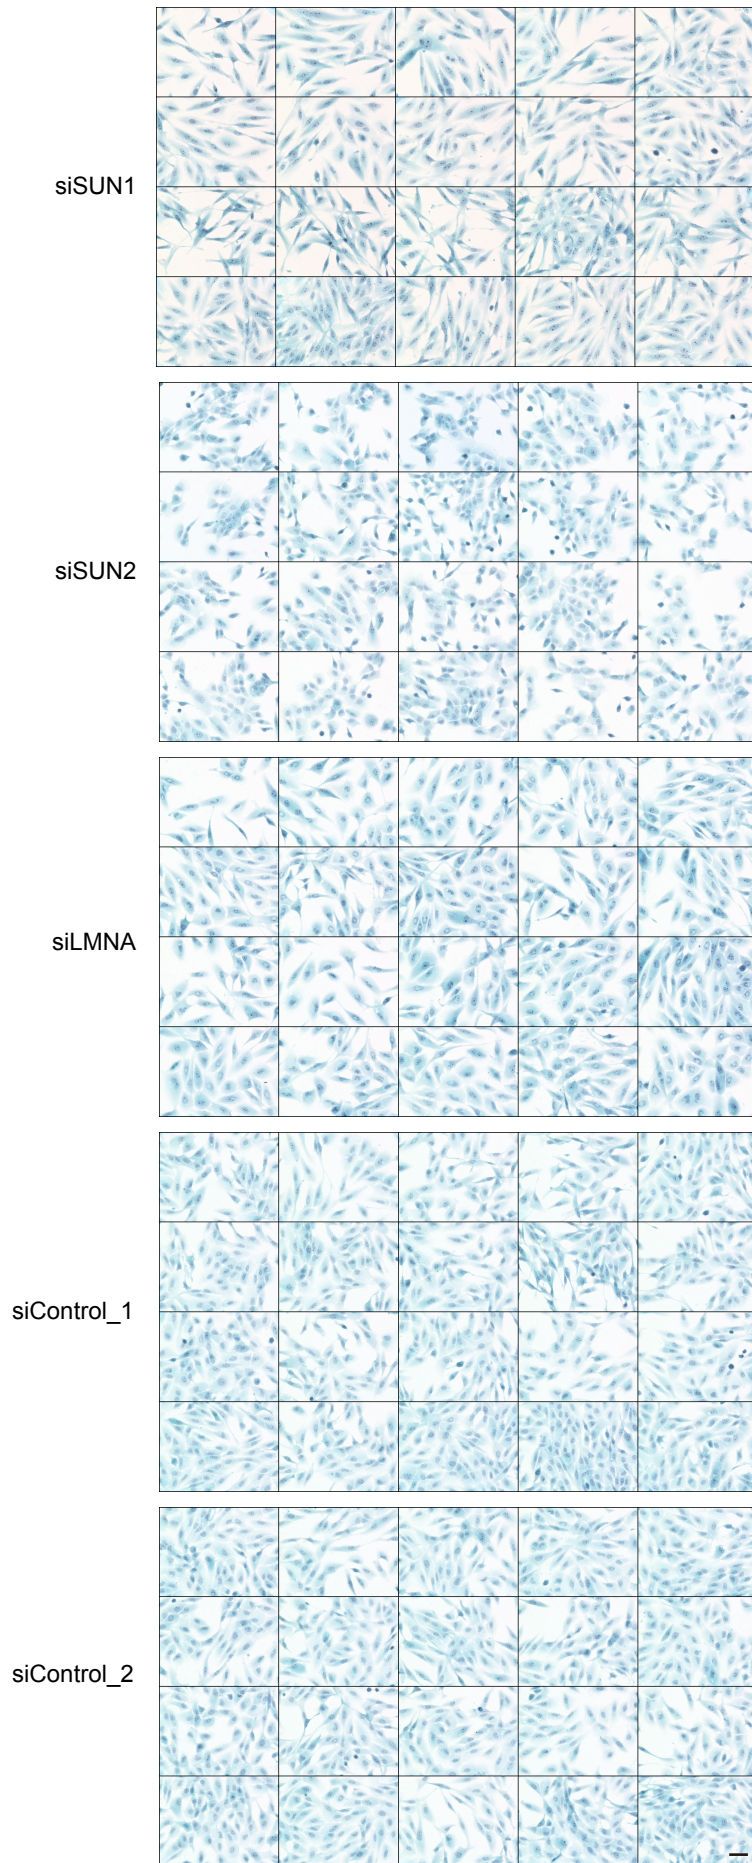

Supplement: kncl-07-01-1149664-s005.pdf [file kncl-07-01-1149664-s005.pdf]

siSUN1

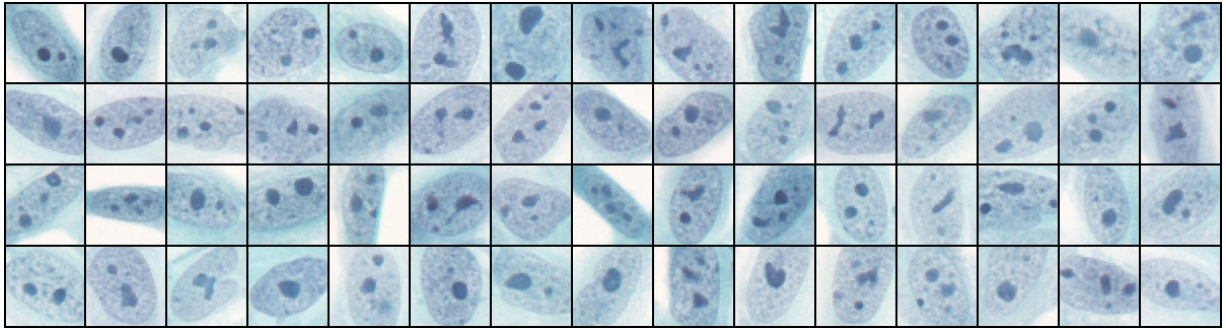

siSUN2

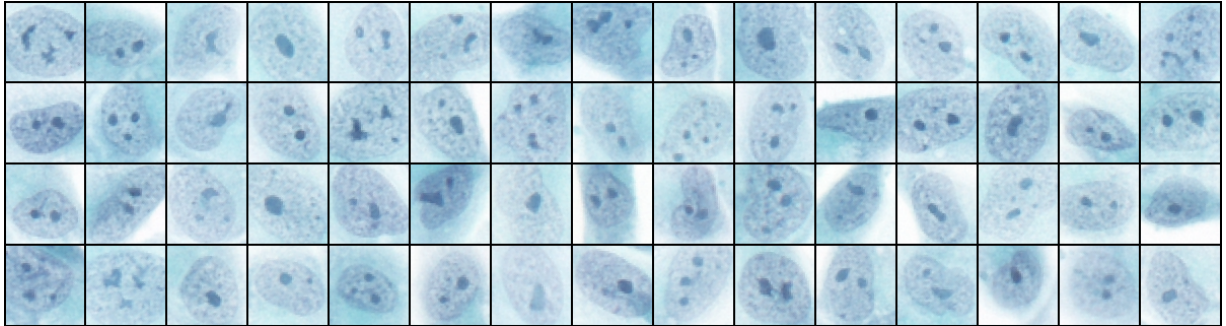

siLMNA

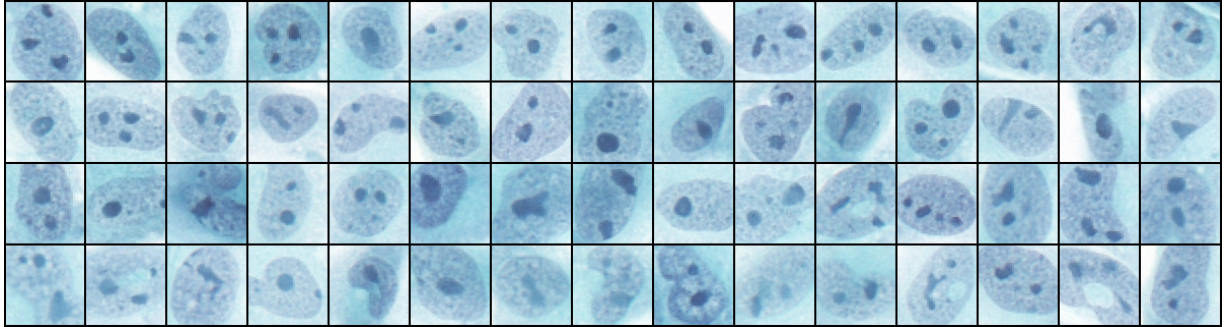

siControl\_1

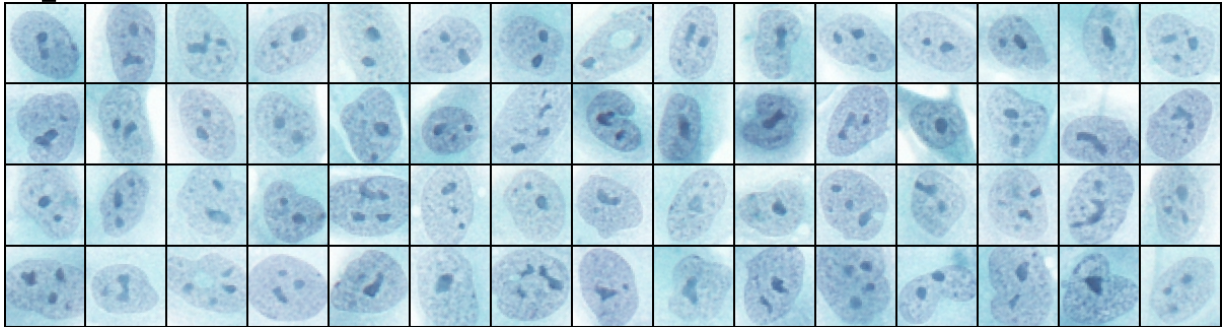

siControl\_2

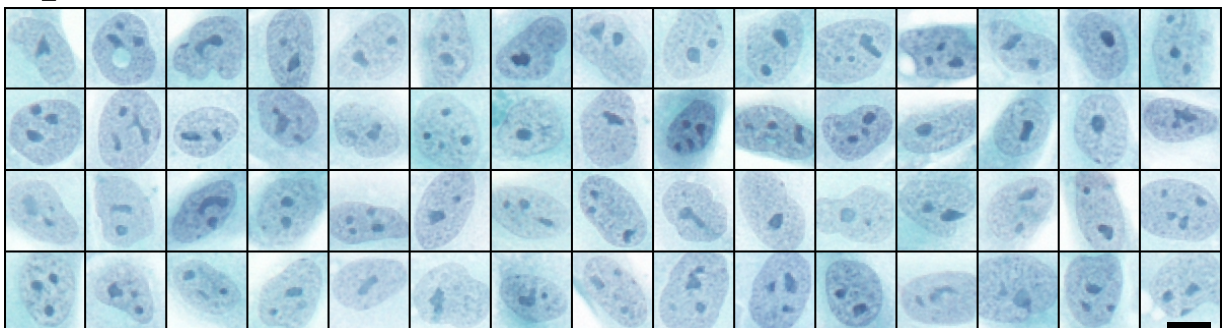

Supplement: kncl-07-01-1149664-s006.pdf [file kncl-07-01-1149664-s006.pdf]

siSUN1

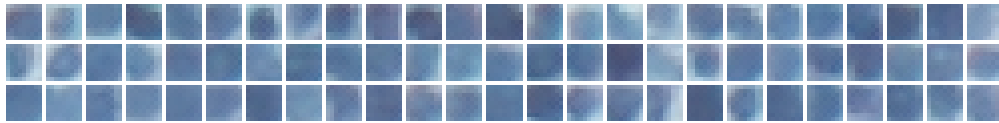

siSUN2

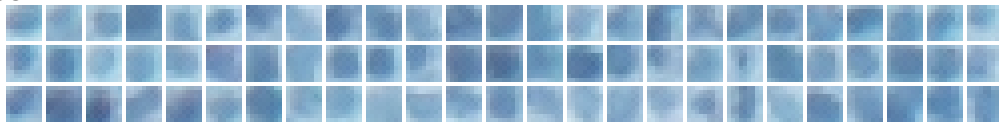

siLMNA

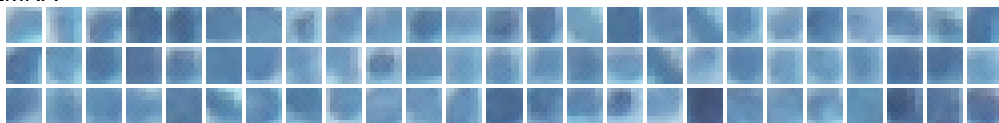

siControl\_1

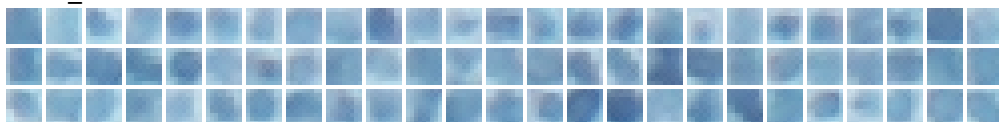

siControl\_2

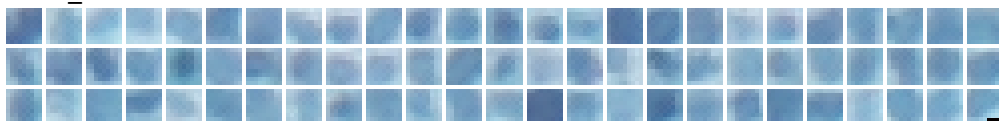

Supplement: kncl-07-01-1149664-s007.pdf [file kncl-07-01-1149664-s007.pdf]

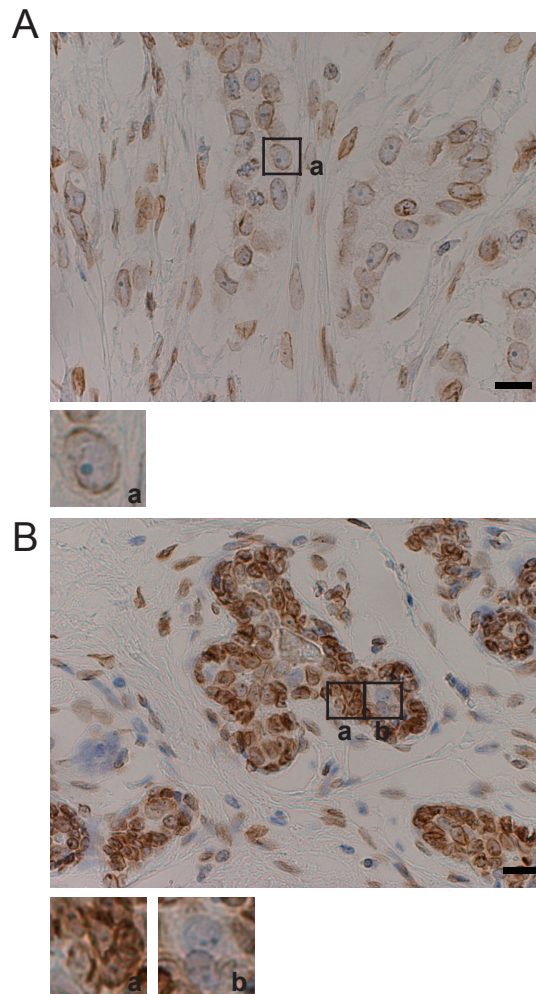

Supplement: kncl-07-01-1149664-s008.pdf [file kncl-07-01-1149664-s008.pdf]
